# Supplementary material for: The HPA/SDC1 axis promotes invasion and metastasis of pancreatic cancer cells by activating EMT via FGF2 upregulation
Source: PubMed Central journal article supplement — Oncol Lett. 2019 Nov 19;19(1):211–20. doi: 10.3892/ol.2019.11121 (PMC6924090; doi:10.3892/ol.2019.11121), 2019-11-19

Figure S1. Overexpression of FGF2 in pancreatic cancer cells. (A) Transfection efficiency of FGF2 recombinant plasmid as determined via reverse transcription-quantitative PCR analysis. (B) Transfection efficiency of FGF2 recombinant plasmid via western blot analysis. \*\*P<0.01. CON, PANC-1 cell line transfected with empty plasmid; FGF2, fibroblast growth factor 2.

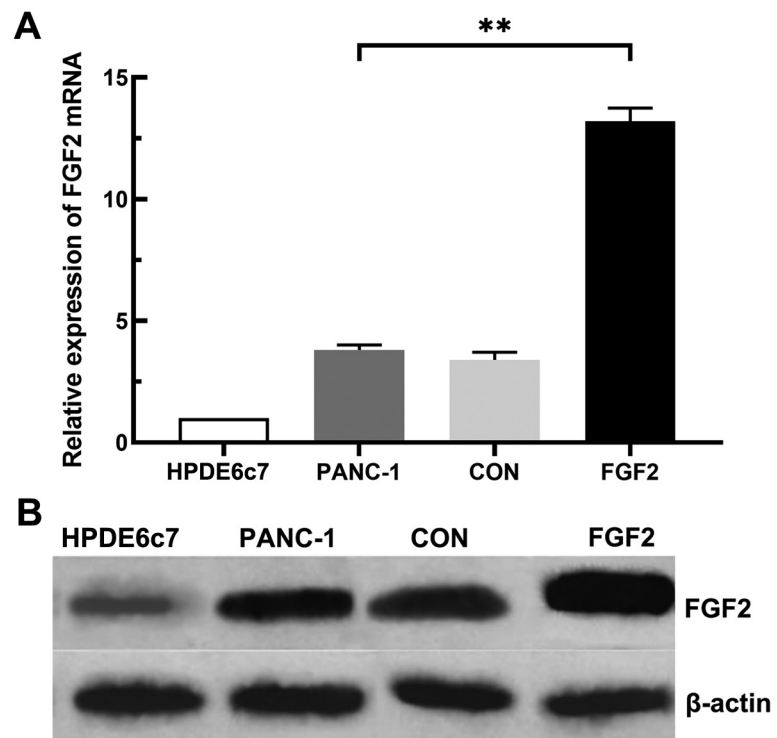

Figure S2. Effect of FGF2 overexpression on Palladin and Akt analyzed by reverse transcription-quantitative PCR. \*P<0.05, \*\*P<0.01. CON, PANC-1 cell line transfected with empty plasmid; FGF2, fibroblast growth factor 2.

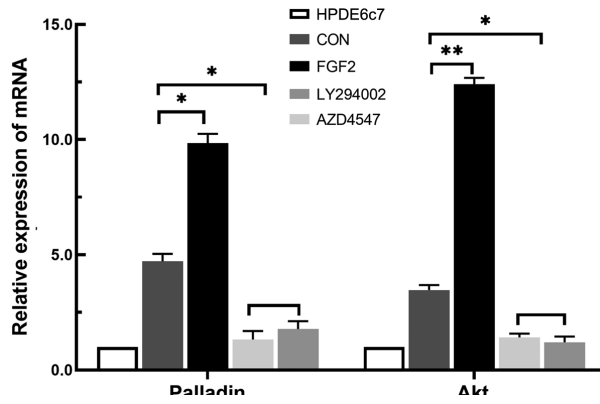

Figure S3. Effect of FGF2 dysregulation on HPA expression. (A) Evaluation of the silencing efficiency of shFGF2 by RT-qPCR. (B) Evaluation of the silencing efficiency of shFGF2 by western blot analysis. (C) Effect of FGF2 dysregulation on HPA expression was analyzed by RT-qPCR. Vector, PANC-1 cell line transfected with empty plasmid. HPA, heparanase; sh, short hairpin (RNA); FGF2, fibroblast growth factor 2; RT-qPCR, reverse transcription-quantitative PCR.

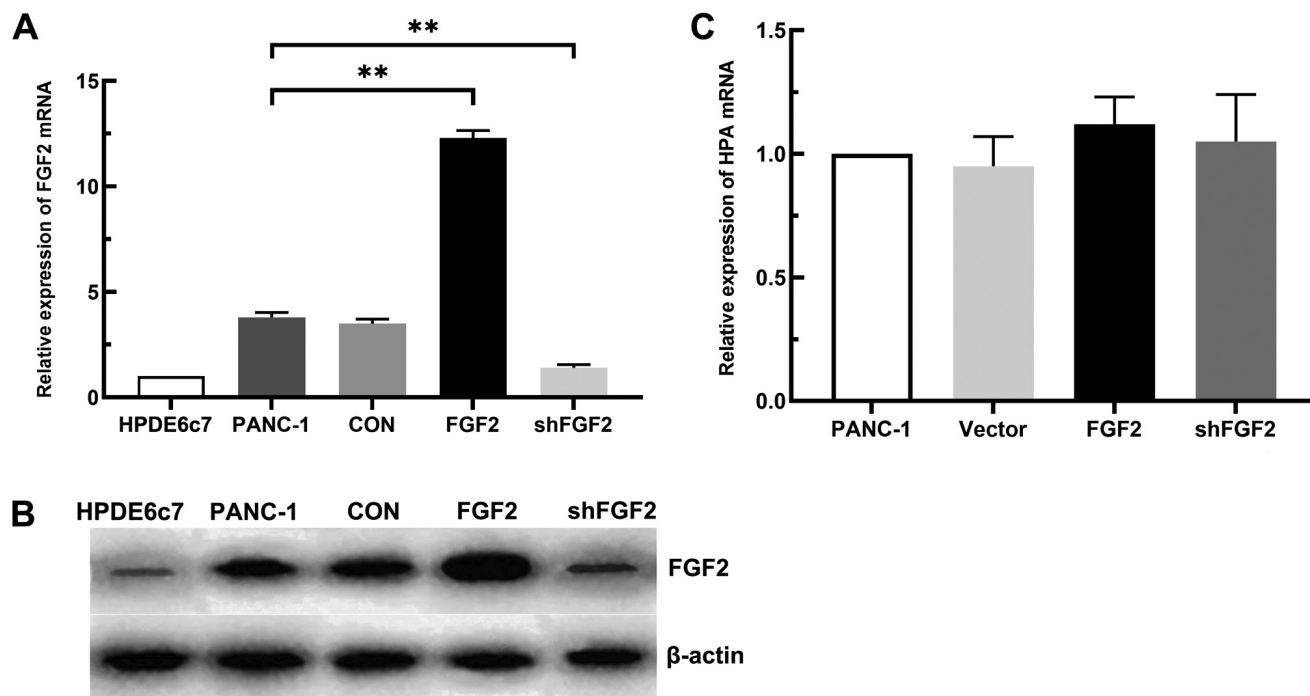

Supplement: Supplementary_Data.pdf [file Supplementary_Data.pdf]
